# Supplementary material for: Increasing Antimicrobial Resistance in Nontyphoidal Salmonella Isolates in Australia from 1979 to 2015
Source: PubMed Central journal article supplement (PMC5786757; doi:10.1128/aac.02012-17), 2018-01-25
Supplement: AAC.02012-17_zac002186879s1.pdf [file AAC.02012-17_zac002186879s1.pdf]

## SUPPLEMENTARY DATA

### Supplementary dataset S1: Serovar distribution

All serovars where n>100 isolates

| <i>Salmonella enterica</i> Serovar | Number | % of total isolates |
|------------------------------------|--------|---------------------|
| <i>S.</i> Typhimurium              | 33,081 | 56.2%               |
| <i>S.</i> Enteritidis              | 2,554  | 4.3%                |
| <i>S.</i> Mississippi              | 2,249  | 3.8%                |
| <i>S.</i> Virchow                  | 1,755  | 3.0%                |
| <i>S.</i> Infantis                 | 1,461  | 2.5%                |
| <i>S.</i> Bovismorbificans         | 1,309  | 2.2%                |
| <i>S.</i> Saintpaul                | 1,066  | 1.8%                |
| <i>S.</i> Stanley                  | 858    | 1.5%                |
| <i>Salmonella</i> 1,4,[5],12:i:-   | 801    | 1.4%                |
| <i>S.</i> Newport                  | 798    | 1.4%                |
| <i>S.</i> Agona                    | 611    | 1.0%                |
| <i>S.</i> Singapore                | 535    | 0.9%                |
| <i>S.</i> Hadar                    | 496    | 0.8%                |
| <i>S.</i> Anatum                   | 460    | 0.8%                |
| <i>S.</i> Derby                    | 406    | 0.7%                |
| <i>S.</i> Heidelberg               | 391    | 0.7%                |
| <i>S.</i> Chester                  | 388    | 0.7%                |
| <i>S.</i> Weltevreden              | 358    | 0.6%                |
| <i>S.</i> Havana                   | 351    | 0.6%                |
| <i>S.</i> Mbandaka                 | 336    | 0.6%                |
| <i>S.</i> Muenchen                 | 329    | 0.6%                |
| <i>S.</i> Birkenhead               | 265    | 0.5%                |
| <i>S.</i> Senftenberg              | 258    | 0.4%                |
| <i>S.</i> Montevideo               | 252    | 0.4%                |
| <i>S.</i> Corvallis                | 240    | 0.4%                |
| <i>S.</i> Oranienburg              | 230    | 0.4%                |
| <i>S.</i> Give                     | 209    | 0.4%                |
| <i>S.</i> Hvittingfoss             | 208    | 0.4%                |
| <i>S.</i> Ohio                     | 205    | 0.3%                |
| <i>S.</i> subsp II ser Sofia       | 205    | 0.3%                |
| <i>S.</i> Cerro                    | 194    | 0.3%                |
| <i>S.</i> Kottbus                  | 189    | 0.3%                |
| <i>S.</i> Potsdam                  | 177    | 0.3%                |
| <i>S.</i> Zanzibar                 | 177    | 0.3%                |
| <i>S.</i> Hessarek                 | 170    | 0.3%                |
| <i>S.</i> Blockley                 | 168    | 0.3%                |
| <i>S.</i> Victoria                 | 160    | 0.3%                |
| <i>S.</i> Bareilly                 | 158    | 0.3%                |
| <i>S.</i> Panama                   | 149    | 0.3%                |
| <i>S.</i> London                   | 147    | 0.2%                |
| <i>S.</i> Kiambu                   | 146    | 0.2%                |
| <i>S.</i> Schwarzengrund           | 146    | 0.2%                |

|                            |               |      |
|----------------------------|---------------|------|
| <i>S. Braenderup</i>       | 139           | 0.2% |
| <i>S. Adelaide</i>         | 131           | 0.2% |
| <i>S. Javiana</i>          | 129           | 0.2% |
| <i>S. Tennessee</i>        | 127           | 0.2% |
| <i>S. Oslo</i>             | 124           | 0.2% |
| <i>S. Aberdeen</i>         | 118           | 0.2% |
| <i>S. Kentucky</i>         | 110           | 0.2% |
| <i>S. Thompson</i>         | 110           | 0.2% |
| <i>S. Reading</i>          | 108           | 0.2% |
| <i>S. Rissen</i>           | 107           | 0.2% |
| <i>S. Bredeney</i>         | 106           | 0.2% |
| <i>S. Orientalis</i>       | 105           | 0.2% |
| <i>Salmonella</i> 16:l,v:- | 105           | 0.2% |
| <i>S. Dublin</i>           | 102           | 0.2% |
| Other serovars             | 2,563         | 4.4% |
| <b>Total</b>               | <b>58,830</b> |      |

**Supplementary dataset S2: Serovars associated with critical resistances, 1984-2015**

| <i>Salmonella</i> serovar                                                                | Non-susceptible<br>(n) | Total (n)     | %          | Adjusted OR <sup>a</sup> | 95% CI       | P-value |
|------------------------------------------------------------------------------------------|------------------------|---------------|------------|--------------------------|--------------|---------|
| <b>Multidrug resistance (non-susceptible to three or more classes of antimicrobials)</b> |                        |               |            |                          |              |         |
| <i>S. Blockley</i>                                                                       | 111                    | 168           | 66.1       | 51.3                     | (34.8, 75.7) | <0.001  |
| <i>Salmonella</i> 1,4,[5],12:i:-                                                         | 588                    | 801           | 73.4       | 48.9                     | (41.1, 58.2) | <0.001  |
| <i>S. Panama</i>                                                                         | 114                    | 149           | 76.5       | 46.9                     | (31.7, 69.5) | <0.001  |
| <i>S. Kentucky</i>                                                                       | 79                     | 110           | 71.8       | 33.5                     | (21.8, 51.5) | <0.001  |
| <i>S. Rissen</i>                                                                         | 68                     | 107           | 63.6       | 23.7                     | (15.9, 35.4) | <0.001  |
| <i>S. Schwarzengrund</i>                                                                 | 72                     | 146           | 49.3       | 21.8                     | (14.8, 32.2) | <0.001  |
| <i>S. Corvallis</i>                                                                      | 101                    | 240           | 42.1       | 9.2                      | (7.1, 12.0)  | <0.001  |
| <i>S. Kiambu</i>                                                                         | 40                     | 146           | 27.4       | 5.6                      | (3.8, 8.1)   | <0.001  |
| <i>S. Hadar</i>                                                                          | 118                    | 496           | 23.8       | 5.3                      | (4.3, 6.6)   | <0.001  |
| <i>S. Stanley</i>                                                                        | 206                    | 858           | 24.0       | 4.7                      | (4.0, 5.6)   | <0.001  |
| <i>S. Derby</i>                                                                          | 45                     | 406           | 11.1       | 2.6                      | (1.8, 3.6)   | <0.001  |
| <i>S. Give</i>                                                                           | 22                     | 209           | 10.5       | 2.4                      | (1.5, 3.8)   | <0.001  |
| <i>S. London</i>                                                                         | 17                     | 147           | 11.6       | 2.2                      | (1.3, 3.6)   | 0.003   |
| <i>S. Agona</i>                                                                          | 66                     | 611           | 10.8       | 2.0                      | (1.5, 2.6)   | <0.001  |
| <i>S. Anatum</i>                                                                         | 50                     | 460           | 10.9       | 1.9                      | (1.4, 2.7)   | <0.001  |
| <i>S. Newport</i>                                                                        | 69                     | 798           | 8.6        | 1.6                      | (1.2, 2.1)   | <0.001  |
| <b>Overall</b>                                                                           | <b>3,783</b>           | <b>58,830</b> | <b>6.4</b> |                          |              |         |

<sup>a</sup> logistic regression, adjusted for year (reference serovar, *S. Typhimurium*)

**Supplementary Dataset S3: MIC breakpoint concentrations used in this study**

| <b>Class</b>             | <b>Antimicrobial(s)</b>                  | <b>Breakpoint concentration (mg/L)</b> |
|--------------------------|------------------------------------------|----------------------------------------|
| <b>Penicillin</b>        | Ampicillin                               | 16                                     |
| <b>Chloramphenicol</b>   | Chloramphenicol                          | 16                                     |
| <b>Folate inhibitors</b> | Trimethoprim                             | 8                                      |
|                          | Sulphathiozole                           | 512                                    |
| <b>Fluoroquinolones</b>  | Nalidixic acid                           | 16                                     |
|                          | Ciprofloxacin (decreased susceptibility) | 0.06                                   |
|                          | Ciprofloxacin                            | 2                                      |
| <b>Cephalosporins</b>    | Cefotaxime                               | 1                                      |
| <b>Tetracycline</b>      | Tetracycline                             | 8                                      |
| <b>Aminoglycosides</b>   | Streptomycin                             | 32                                     |
|                          | Gentamicin                               | 8                                      |
|                          | Kanamycin                                | 16                                     |
| <b>Carbapenems</b>       | Meropenem                                | 1                                      |

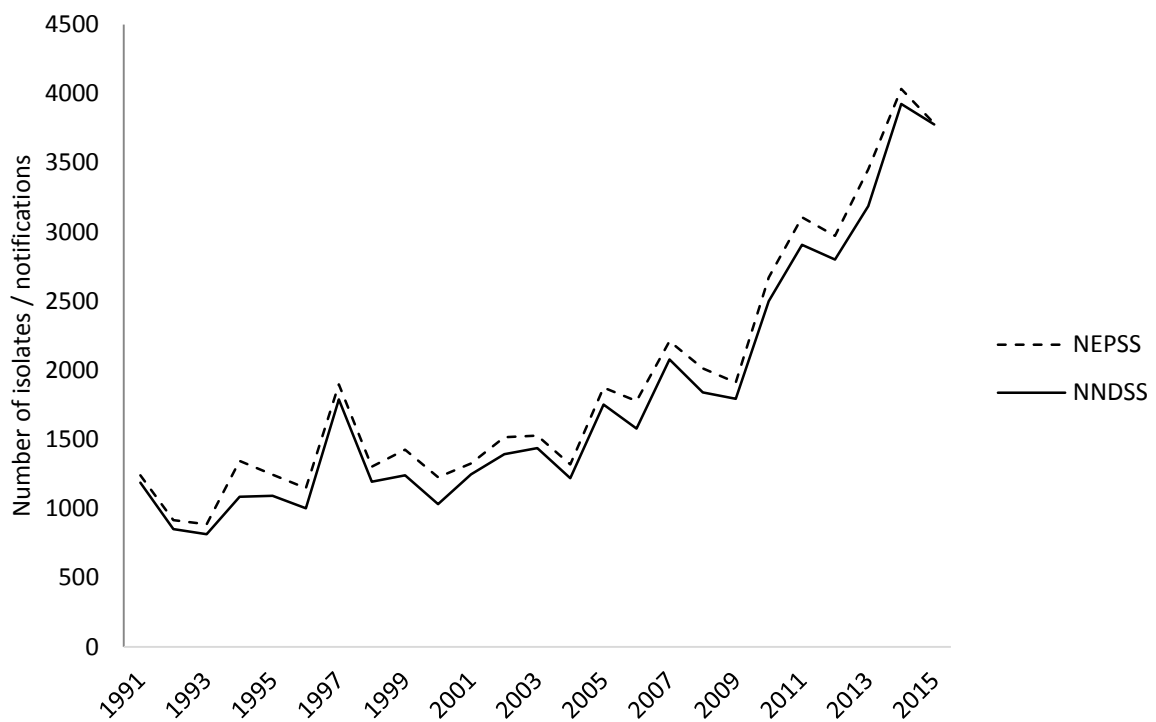

Supplementary Figure 1. Number of non-typhoidal *Salmonella enterica* isolates received through the National Enteric Pathogen Surveillance Scheme (NEPSS) from Victoria and Tasmania (dashed line) and number of notifications for salmonellosis recorded in the National Notifiable Diseases Surveillance System (solid line).
